1 **Viral susceptibility across host species is largely independent of dietary**  
2 **protein to carbohydrate ratios**

3

4 **Twitter summary:** No role of host diet in susceptibility to a novel viral pathogen  
5 across host species

6

7 **Impact Statement:** A successful host shift of a parasite from one susceptible  
8 species to a novel host can be influenced by many ecological factors. Changes in  
9 host diet can alter the immune response and outcomes of host-parasite  
10 interactions and could potentially alter the outcome of a virus host shift. To  
11 investigate, we infected 27 species of Drosophilidae with an RNA virus (DCV)  
12 across three food types with differing protein to carbohydrate ratios. We then  
13 looked at pathogen loads and survival of infected hosts compared to uninfected  
14 controls. Changes in the ratio of protein to carbohydrate did not alter  
15 susceptibility to DCV across host species.

16

17 **Abstract**

18 The likelihood of a successful host shift of a parasite to a novel host  
19 species can be influenced by environmental factors that can act on both the host  
20 and parasite. Changes in nutritional resource availability have been shown to  
21 alter pathogen susceptibility and the outcome of infection in a range of systems.  
22 Here we examined how dietary protein to carbohydrate altered susceptibility in  
23 a large cross infection experiment. We infected 27 species of Drosophilidae with  
24 an RNA virus on three food types of differing protein to carbohydrate ratios. We  
25 then measured how viral load and mortality across species was affected by

26 changes in diet. We found that changes in the protein:carbohydrate in the diet  
27 did not alter the outcomes of infection, with strong positive inter-species  
28 correlations in both viral load and mortality across diets, suggesting no species  
29 by diet interaction. Mortality and viral load were strongly positively correlated,  
30 and this association was consistent across diets. This suggests changes in diet  
31 may give consistent outcomes across host species, and may not be universally  
32 important in determining host susceptibility to pathogens.

33

### 34 **Introduction**

35 A key driver of pathogen host shifts – where a pathogen jumps from one host  
36 species to another – is environmental change (Hoberg & Brooks, 2015; Carlson *et*  
37 *al.*, 2020). For a host shift to successfully occur a novel host must first be exposed  
38 to a parasite, which must then be able to replicate and successfully infect the  
39 host, before sufficient onward transmission (Woolhouse *et al.*, 2005). Ecological  
40 factors can therefore influence the likelihood of host shifts by altering species  
41 distributions and abundances making encounters more likely, or by acting as  
42 stressors that alter physiological factors including immunity or virulence. The  
43 main ecological factor studied has been temperature, which can have  
44 asymmetrical impacts on hosts and parasites and potentially alter the likelihood  
45 of host shifts (Brooks & Hoberg, 2007; Hoberg & Brooks, 2015; Kirk *et al.*, 2018;  
46 Roberts *et al.*, 2018). The role of other ecological traits such as resource  
47 availability, humidity, population density and geographical range, or within host  
48 ecological traits such as metabolic rate, have been less well studied in explaining  
49 the outcomes of host shifts, despite an increasing understanding of the role such  
50 factors play in effecting the outcomes of host parasite interactions (Blanford &

51 Thomas, 1999; Harvell *et al.*, 2002; Ponton *et al.*, 2013; Hayman *et al.*, 2016;  
52 Cumnock *et al.*, 2018).

53

54 Nutrition can shape the outcome of host-parasite interactions through its ability  
55 to moderate both parasite virulence and host resistance (Ponton *et al.*, 2011,  
56 2013; Pike *et al.*, 2019). The nutritional resources of a host can impact its ability  
57 to resist infection as immune responses are thought to be costly to both maintain  
58 and activate (Kraaijeveld & Godfray, 1997; Lochmiller & Deerenberg, 2000;  
59 McKean *et al.*, 2008; Cotter *et al.*, 2011; Kutzer & Armitage, 2016; Knutie *et al.*,  
60 2017). Nutrition is known to have long term consequences, with developmental  
61 nutritional status being shown to have latent or even trans-generational effects  
62 on immune responses (in *Drosophila*: Fellous & Lazzaro, 2010; Savola *et al.*,  
63 2020b and reviewed in Grueber *et al.*, 2018). Hosts can also show behavioural  
64 modifications in feeding upon infection; parasite-induced anorexia is thought to  
65 be an adaptive host response (Ayres & Schneider, 2009; Rao *et al.*, 2017). In  
66 some cases hosts actively increase the consumption of certain nutrients in their  
67 diet for example, the African armyworm – *S. exempta* upon infection with a  
68 baculovirus displays macronutrient self-medication (Povey *et al.*, 2009).

69 Nutrition may constrain the amount of investment that a host can allocate to an  
70 energetically demanding immune response (Kraaijeveld & Godfray, 1997;  
71 Lochmiller & Deerenberg, 2000; Cotter *et al.*, 2011; Knutie *et al.*, 2017), and  
72 coping with costs associated with a parasite burden if infection does become  
73 established (Sheldon & Verhulst, 1996). A suboptimal nutritional status may lead  
74 a host to be unable to suppress or tolerate a parasite challenge they may  
75 otherwise have been able to resist; or have reduced fitness from a trade off in

76 resources with life history traits (Kraaijeveld & Godfray, 1997; Lochmiller &  
77 Deerenberg, 2000; Cotter *et al.*, 2011; Knutie *et al.*, 2017).

78

79 From a parasite perspective infecting a host of suboptimal nutritional status may  
80 mean they encounter a weaker immune response and therefore infection and  
81 establishment is easier (Siva-Jothy & Thompson, 2002). However, once  
82 established the parasite may encounter its own resource limitations due to  
83 competition with an already depleted host, causing suboptimal growth and  
84 potentially affecting onward transmission. Therefore, predicting the outcome of  
85 the interaction between nutrition, host immunity and subsequent resistance is  
86 complex as the effects on the two parties may be divergent (Bedhomme *et al.*,  
87 2004).

88

89 Multiple life history traits are moderated by resource availability, with condition  
90 dependency across reproductive traits, aging and lifespan (Lee *et al.*, 2008;  
91 Maklakov *et al.*, 2009; Camus *et al.*, 2017; Henry & Colinet, 2018; Henry *et al.*,  
92 2020). Laboratory experiments on dietary restriction, where individuals  
93 experienced a reduction in nutrition without inducing malnutrition  
94 (differentiated from Calorie Restriction) have been found to extend life span in a  
95 range of organisms (Weindruch & Walford, 1982; Klass, 1983; Anderson *et al.*,  
96 2003; Nakagawa *et al.*, 2012). The effects of dietary restriction appear to be  
97 explained by resource-mediated trade-offs between longevity and reproductive  
98 effort (but see review by (Moatt *et al.*, 2020)). Geometric frameworks – the use of  
99 artificial diets with known compositions of specific nutrients that develop an

100 understanding of dimensional nutrient space – have been used to examine the  
101 consequences of different ratios of macronutrients across a range of  
102 organisms (Simpson & Raubenheimer, 1995, 2011; Raubenheimer & Simpson,  
103 1999). In *Drosophila* different life-history traits were optimized at different  
104 protein-carbohydrate intakes (Lee *et al.*, 2008; Skorupa *et al.*, 2008; Fanson *et al.*,  
105 2009; Jensen *et al.*, 2015). Across multiple species, low protein to carbohydrate  
106 ratios reduce reproductive rates but maximise lifespan (Nakagawa *et al.*, 2012;  
107 Le Couteur *et al.*, 2016). However, individuals with diets higher in protein and  
108 lower in carbohydrates have greater reproductive rates but shorter life spans.  
109 When given a choice of diet, individuals have been shown to optimise  
110 reproduction over lifespan (Bunning *et al.*, 2016). Host dietary frameworks have  
111 been used to examine effects on bacterial pathogens (Povey *et al.*, 2009; Cotter *et*  
112 *al.*, 2019; Savola *et al.*, 2020b; Wilson *et al.*, 2020), viral pathogens (Lee *et al.*,  
113 2006; Povey *et al.*, 2014), and individual aspects of immunity and gene  
114 expression (Cotter *et al.*, 2011, 2019; Keaton Wilson *et al.*, 2019). In particular,  
115 studies of viral infection in insects have found that high dietary protein leads to  
116 increased resistance (Lee *et al.*, 2006) indicating there may be higher protein  
117 costs of resistance.

118

119 To investigate the effect that host diet has on the susceptibility of different host  
120 species we infected 27 species of Drosophilidae, with Drosophila C Virus (DCV)  
121 fed on three diets with varying ratios of protein to carbohydrates but  
122 comparable calorie content. We then measured the change in viral load and host  
123 mortality across these different diets. DCV is a positive sense RNA virus in the

124 family *Dicistroviridae*. DCV was isolated from *D. melanogaster* although has also  
125 been detected in the closely related *D. simulans* (Christian, 1987), and in the wild  
126 it is thought to be transmitted faecal-orally (Jousset *et al.*, 1972). Infection of DCV  
127 by inoculation is highly pathogenic in adult flies causing increased mortality  
128 rates, metabolic and behavioural changes and nutritional stress in the midgut,  
129 causing similar pathologies to those seen in starvation (Christian, 1987; Arnold  
130 *et al.*, 2013; Chtarbanova *et al.*, 2014; Vale & Jardine, 2017). DCV shows specific  
131 tissue tropism in *D. melanogaster*, with infection of the heart tissue, fat body,  
132 visceral muscle cells around the midgut and food storage organ (crop) causing  
133 reduced defecation, food blockage and dehydration/starvation (Ferreira *et al.*,  
134 2014). Infection progresses in a similar manner following both oral or septic  
135 inoculation, with the same tissues ultimately becoming infected (Cherry &  
136 Perrimon, 2004; Arnold *et al.*, 2013; Chtarbanova *et al.*, 2014; Ferreira *et al.*,  
137 2014). If hosts are in a nutritional environment that allows for investment in  
138 immune function or damage repair, they may be more able to resist, or tolerate a  
139 novel infection (Ponton *et al.*, 2011, 2013; Pike *et al.*, 2019). This could then lead  
140 to different outcomes following a host shift, either the host could manage to  
141 suppress the parasite or avoid infection entirely, or could become infected and  
142 minimise parasite damage (Lazzaro & Little, 2009; Howick & Lazzaro, 2014).  
143 Alternatively hosts may be fully susceptible to infection, and enriched resources  
144 may act to enhance pathogen virulence by enabling within host pathogen growth  
145 (Hall *et al.*, 2009; Pike *et al.*, 2019). Previous work has demonstrated that  
146 following inoculation into a novel host species, the host phylogeny is an  
147 important determinant of susceptibility to DCV (Longdon *et al.*, 2011, 2015). The  
148 host phylogeny explains a large proportion of the variation in DCV virulence

149 (mortality) and viral load (75% and 67% respectively) with high virulence being  
150 associated with high viral loads (Longdon *et al.*, 2015). One of the fundamental  
151 steps needed for a successful host shift is the ability of a pathogen to infect a  
152 novel host. Here we ask if the nutritional environment alters the susceptibility to  
153 DCV following a shift into a range of novel host species, and whether such  
154 patterns are consistent across species.

155

## 156 **Methods**

### 157 **Diet preparation**

158 Three different cornmeal diets were used (*Supplementary of species used and*  
159 *food type*). The standard cornmeal diet used in our lab comprised a 1:10 protein  
160 to carbohydrate ratio and became our “Medium” - protein: carbohydrate ratio  
161 diet treatment. We also developed two further diets that were approximately  
162 isocaloric, a low protein: carbohydrate food (1: 20 protein to carbohydrate) and  
163 a high protein: carbohydrate food (1: 5 protein carbohydrate); see  
164 supplementary for full table of food recipes nutrient breakdown. These were  
165 based around previous findings that suggested that in *D. melanogaster* lifespan  
166 was maximized on a protein: carbohydrate ratio of around 1:16, and fitness -  
167 measured as lifetime egg production at a ratio of 1:4 (Lee *et al.*, 2008). All diets  
168 were manipulated by altering the dextrose and yeast amounts whilst  
169 maintaining as close as possible the same calorie content at 142 Calories g/100  
170 ml. Yeast was manipulated as it provides the majority of the protein as well as  
171 other non-caloric nutritional requirements (Piper, 2017). Values were confirmed  
172 using the *Drosophila* Dietary Composition Calculator (Lesperance & Broderick,  
173 2020).

## 27 Drosophilidae species

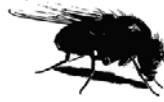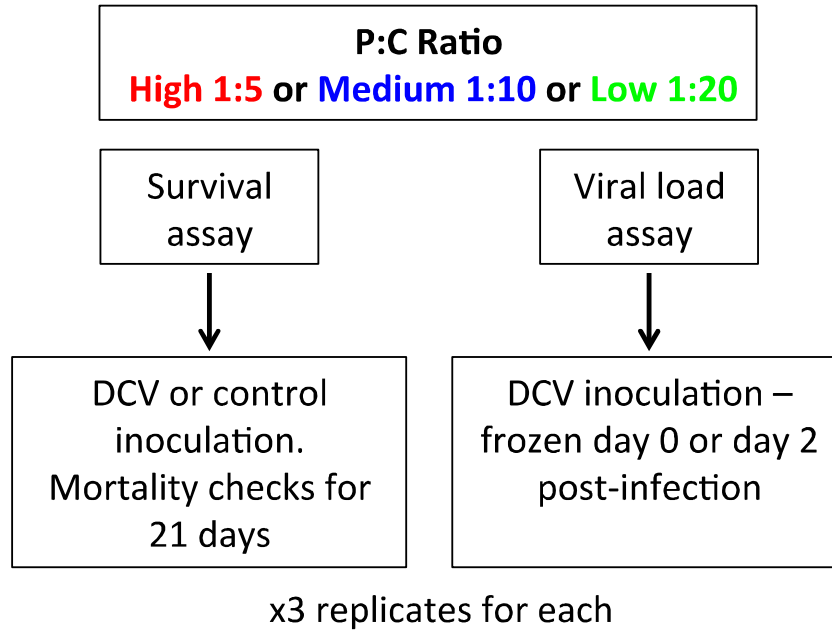

### 183 **Viral Infections**

184 Twenty-seven different species of Drosophilidae were maintained in multi  
185 generation populations, in Drosophila stock bottles (Fisherbrand) on 50 ml of  
186 their respective food medium at 22°C and 70% relative humidity with a 12-hour  
187 light-dark cycle (See *Supplementary for species and food*). Each day, two vials of  
188 0-1 day old male flies were randomly assigned to one of three potential food



189 types; low, medium or high, protein: carbohydrate ratio. The mating status of  
190 flies was not controlled as some species may reach sexual maturity before  
191 collection. We used male flies only for this study to remove any potential effect of  
192 sex. Flies were kept on their respective food treatments for 5 days, and tipped  
193 onto fresh vials of food every day (Broderick & Lemaitre, 2012; Blum *et al.*,  
194 2013). After 5 days of acclimatisation on their food treatment flies were  
195 experimentally infected with DCV. These collections and inoculations were  
196 carried out over three replicate blocks, with each block being completed over  
197 consecutive days (Figure 1). The order that the species were infected was  
198 randomized each day, as was food treatment for each species.

199

200 We used Drosophila C virus (DCV) strain B6A (Longdon *et al.*, 2018), which is  
201 derived from an isolate collected from *D. melanogaster* in Charolles, France  
202 (Jousset *et al.*, 1972). The virus was prepared as described previously (Longdon  
203 *et al.*, 2013). Briefly, DCV was grown in Schneider's Drosophila line 2 cells and  
204 the Tissue Culture Infective Dose 50 (TCID<sub>50</sub>) per ml was calculated using the  
205 Reed-Muench end-point method. Flies were anesthetized on CO<sub>2</sub> and inoculated  
206 using a 0.0125 mm diameter stainless steel needle that was bent to a right angle  
207 ~0.25mm from the end (Fine Science Tools, CA, USA). The bent tip of the needle  
208 was dipped into the DCV solution (TCID<sub>50</sub> = 6.32×10<sup>9</sup>) and pricked into the  
209 pleural suture on the thorax of the flies (Longdon *et al.*, 2015). We selected this  
210 route of infection as oral inoculation has been shown to lead to stochastic  
211 infection outcomes in *D. melanogaster*, with injection producing a more  
212 reproducible infection, that has been found to follow a similar course to an oral  
213 infection, with the same tissues ultimately becoming infected by both methods

214 (Cherry & Perrimon, 2004; Chtarbanova *et al.*, 2014; Ferreira *et al.*, 2014;  
215 Merklung & van Rij, 2015). One vial of inoculated flies was immediately snap  
216 frozen in liquid nitrogen to provide a time point zero samples to be used as a  
217 reference sample to control for relative viral dose. The second vial of flies were  
218 infected and then placed back into a new vial of their respective food treatment.  
219 After 2 days (+/- 1 hour) flies were snap frozen in liquid nitrogen. This time  
220 point was chosen based on previous studies that show a clear increase in viral  
221 growth but little mortality at 2 days post infection (Longdon *et al.*, 2015; Roberts  
222 *et al.*, 2018). Each experimental block contained a day 0 and day 2 replicate for  
223 each species, at each diet (27 species × 3 diet treatments × 3 experimental  
224 blocks). In total, we quantified viral load in 7580 flies in 474 biological replicates  
225 (biological replicate = change in viral load from day 0 to day 2 post-infection),  
226 with a mean of 16 flies per replicate (range across species = 8-28).

227

## 228 **Survival**

229 In order to measure the effect of diet on virulence we also carried out a survival  
230 assay where mortality was recorded following infection. The same infection  
231 protocol was carried out as above; one vial of flies was infected with DCV whilst  
232 the other was injected using a clean virus free needle dipped in *Drosophila*  
233 Ringer's solution (Sullivan *et al.*, 2000) (Figure 1). Flies were maintained in vials  
234 as described above and tipped onto their respective fresh food every 2 days. The  
235 number of dead flies was counted every day for 21 days. The survival assay was  
236 carried out across three blocks with infections carried out over consecutive days,  
237 to obtain a control and infected vial per species each day. Treatment (virus or  
238 control) and the order in which fly species were inoculated were randomized

239 between blocks. Diet was randomized across days, so for a given food type a  
240 control and viral infected vial was completed each day, and this was repeated  
241 over consequent days until there was a control and infected for each species on  
242 each food type (27 species × 2 treatments (control or challenged) × 3 diet  
243 treatments × 3 experimental blocks). In total, we measured mortality in 9222  
244 flies with a mean of 20 flies per replicate (range across species: 6–30 flies).

245

#### 246 **Measuring the change in viral load**

247 The change in RNA viral load from day 0 to day 2-post infection was measured  
248 using quantitative Reverse Transcription PCR (qRT-PCR). Frozen flies were  
249 homogenised in Trizol reagent (Invitrogen) using a bead homogeniser for 30  
250 seconds (Bead Ruptor 24; Omni international) and stored at -80°C for later  
251 extraction. Total RNA was extracted from the Trizol homogenised flies in a  
252 chloroform isopropanol extraction, reverse-transcribed with Promega GoScript  
253 reverse transcriptase and random hexamer primers. Viral RNA load was  
254 expressed relative to the endogenous control housekeeping gene *RpL32*. Primers  
255 were designed to match the homologous sequence in each species and crossed  
256 an intron-exon boundary so will only amplify mRNA. The primers in *D.*  
257 *melanogaster* were *RpL32* qRT-PCR F (5'-TGCTAAGCTGTCGCACAAATGG -3') and  
258 *RpL32* qRT-PCR R (5'- TGCGCTTGTTTCGATCCGTAAC -3') (see supplementary  
259 table and Longdon *et al.*, 2011). DCV primers were 599F (5'-GACACTGCCTTT  
260 GATTAG-3') and 733R (5'CCCTCTGGGAACTAAATG-3') as previously described  
261 (Longdon *et al.*, 2015). Two qRT-PCR reactions (technical replicates) were  
262 carried out per sample with both the viral and endogenous control primers, with  
263 replicates distributed across plates in a randomised block design. qRT-PCR was

264 performed on an Applied Biosystems StepOnePlus system using Sensifast Hi-Rox  
265 Sybr kit (Bioline) with the following PCR cycle: 95°C for 2 min followed by 40  
266 cycles of: 95°C for 5 sec followed by 60°C for 30 sec. Each qRT-PCR plate  
267 contained four standard samples. A linear model was used to correct the cycle  
268 threshold (Ct) values for differences between qRT-PCR plates. Samples where  
269 the technical replicates had Ct values more than 2 cycles apart after plate  
270 correction were repeated. To estimate the change in viral load, we first  
271 calculated  $\Delta Ct$  as the difference between the cycle thresholds of the DCV qRT-  
272 PCR and the RpL32 endogenous control. For each species the viral load of day 2  
273 flies relative to day 0 flies was calculated as  $2^{-\Delta\Delta Ct}$ ; where  $\Delta\Delta Ct = \Delta Ct \text{ day0} - \Delta Ct$   
274  $\text{day2}$ . The  $\Delta Ct \text{ day 0}$  and  $\Delta Ct \text{ day 2}$  is a pair of  $\Delta Ct$  values from a day 0 biological  
275 replicate and a day 2 replicate.

276

277

| Diet   | Ratio Protein: Carb | Cornmeal (g) | Dextrose (g) | Yeast (g) | Agar (g) | Nipagin (ml) | dH2O (L) | Calories per 100ml |
|--------|---------------------|--------------|--------------|-----------|----------|--------------|----------|--------------------|
| High   | 1:5                 | 176          | 131.2        | 84        | 22       | 29           | 1        | 142.60             |
| Medium | 1:10                | 176          | 176          | 38        | 22       | 29           | 1        | 142.30             |
| Low    | 1:20                | 176          | 203          | 10        | 22       | 29           | 1        | 142.02             |

278 **Table 1: Ingredients for the experimental diet treatments.** Amounts given  
279 are enough to produce ~100 vials of food, with calculated calories per 100ml.  
280

### 281 **Effect of Body Size**

282 To account for any potential differences in body size between species, we  
283 measured wing length as a proxy for body size (Huey *et al.*, 2006). During the

284 collections for the viral load assay males of each species were collected and  
285 immediately stored in ethanol. Subsequently, wings were removed and  
286 photographed under a dissecting microscope. Using ImageJ software (version  
287 1.48) the length of the IV longitudinal vein from the tip of the proximal segment  
288 to where the distal segment joins vein V was recorded, and the mean taken for  
289 each species, overall there was a mean of 28 wings measured per species (range  
290 20–35).

291

### 292 **Host phylogeny**

293 The host phylogeny was inferred as described previously (Longdon *et al.*, 2015)  
294 using seven genes (mitochondrial; *COI*, *COII*, ribosomal; *28S* and nuclear; *Adh*,  
295 *SOD*, *Amyrel*, *RpL32*). Publicly available sequences were downloaded from  
296 Genbank or were Sanger sequenced. In total we had *RpL32* sequences for all 27  
297 species, *28S* from 24 species, *Adh* from 24 species, *Amyrel* from 15 species, *COI*  
298 from 27 species, *COII* from 27 species and *SOD* from 12 species. For each gene  
299 the sequences were aligned in Geneious (version 9.1.8) (Kearse *et al.*, 2012)  
300 using the global alignment setting, with free end gaps and a cost matrix of 70%  
301 similarity. The phylogeny was inferred using BEAST (v1.10.4) (Drummond *et al.*,  
302 2012), with genes partitioned into three groups; mitochondria, ribosomal and  
303 nuclear, with their own molecular clock models. A random starting tree was  
304 used, with a relaxed uncorrelated lognormal molecular clock. Each of the  
305 partitions used a HKY substitution model with a gamma distribution of rate  
306 variation with 4 categories and estimated base frequencies. Additionally, the  
307 mitochondrial and nuclear data sets were partitioned into codon positions 1+2

308 and 3, with unlinked substitution rates and base frequencies across codon  
309 positions. The tree-shape prior was set to a birth-death process. The BEAST  
310 analysis was run twice to ensure convergence for 1000 million MCMC  
311 generations sampled every 10000 steps. On completion the MCMC process was  
312 examined using the program Tracer (version 1.7.1) (Rambaut *et al.*, 2014) to  
313 ensure convergence and adequate sampling, and the constructed tree was then  
314 visualised using FigTree (v1.4.4) (Rambaut, 2006).

315

### 316 **Statistical analysis**

317 We used phylogenetic mixed models to look at the effects of host relatedness on  
318 mortality and viral load across the three diet treatments. We fitted all models  
319 using a Bayesian approach in the R package MCMCglmm version 2.29 (Hadfield,  
320 2010) in RStudio (R version 3.5.1) (R Development Core Team, 2005). We used a  
321 multivariate model with mortality of the controls, mortality of the virus infected  
322 flies and viral load at each of the diets as the response variables. Mortality was  
323 calculated as the mean portion of flies alive each day for each vial. The model  
324 took the following form:

325

$$326 \quad y_{hit} = \beta_{1,t} + wingsize\beta_{2,t} + u_{p:ht} + e_{hit}$$

327

328 Where  $y$  is the change in viral load of the  $i^{th}$  biological replicate of host species  $h$ ,  
329 for trait  $t$ .  $\beta$  are the fixed effects, with  $\beta_1$  being the intercepts for each trait and  $\beta_2$   
330 being the effect of wing size.  $U_p$  are the random phylogenetic species effects and  $e$   
331 the model residuals. The models were also run with a species-specific  
332 component independent of phylogeny ( $u_{s,ht}$ ) that allow us to estimate the

333 proportion of variation that is not explained by the host phylogeny ( $v_s$ ) (Longdon  
334 *et al.*, 2011). The main model was run without this term as it struggled to  
335 separate the phylogenetic and non-phylogenetic terms. Our main model  
336 therefore assumes a Brownian motion model of evolution (Felsenstein, 1973).  
337 The random effects and the residuals are assumed to be multivariate normal  
338 with a zero mean and a covariance structure  $\mathbf{V}_p \otimes \mathbf{A}$  for the phylogenetic affects  
339 and  $\mathbf{V}_e \otimes \mathbf{I}$  for the residuals ( $\otimes$  here is the Kronecker product).  $\mathbf{A}$  is the  
340 phylogenetic relatedness matrix,  $\mathbf{I}$  is an identity matrix and the  $\mathbf{V}$  are 9x9  
341 (co)variance matrices describing the (co)variances between viral load, mortality  
342 in virus infected, and mortality in controls each at the 3 different diet levels. The  
343 phylogenetic covariance matrix,  $\mathbf{V}_p$  – describes the inter-specific variances in  
344 each trait and the inter-specific covariances between them. The residual  
345 covariance matrix,  $\mathbf{V}_e$  describes the within-species variance that includes both  
346 any actual within-species effects and also any measurement or experimental  
347 error. The off-diagonal elements in  $\mathbf{V}_e$  (the covariances) are unable to be  
348 estimated because no vial has multiple measurements – so were set to zero. The  
349 MCMC chain was run for 1300 million iterations with a burn-in of 30 million  
350 iterations and a thinning interval of 1 million. Results were tested for sensitivity  
351 to the use of different priors by being run with different prior structures (see  
352 supplementary R code), which gave qualitatively similar results. We also ran  
353 models with the data subset into viral load and mortality that gave similar  
354 results. All confidence intervals (CI's) reported are 95% highest posterior  
355 density intervals. In order to test for the interaction between diet and species we  
356 calculated correlations between traits from the variance covariance matrix from  
357 the diet:species random effect ( $u_{p,ht}$ ). If the correlations between traits are close

358 to one and there is no change in the means or the variance, it would suggest that  
359 there is no species-by-diet interaction. We confirmed our experimental design  
360 and sample sizes had sufficient power to detect effects by down sampling a  
361 similar dataset (Roberts *et al.*, 2018).

362

### 363 **Results**

364 In order to investigate the effect that host diet may have on the likelihood of  
365 virus host shifts we quantified DCV viral load in 27 species of Drosophilidae that  
366 had been housed on three different diets (Fig.2). Viral loads differed between  
367 species, with a billion times more virus in the most susceptible compared to the  
368 least susceptible species, consistent with previous studies (Longdon *et al.*, 2015;  
369 Roberts *et al.*, 2018). Viral loads were highly repeatable, with the inter-specific  
370 phylogenetic component ( $v_p$ ), explaining a high proportion of the variation in  
371 viral load across diets with little within species or measurement error ( $v_e$ )  
372 (Repeatability =  $v_p / (v_p + v_e)$ ; Low = 0.92 (95% CI: 0.86, 0.96); Medium = 0.90  
373 (95% CI: 0.84,0.96); High = 0.83 (95% CI: 0.75, 0.92).



Diet and pathogen susceptibility across species

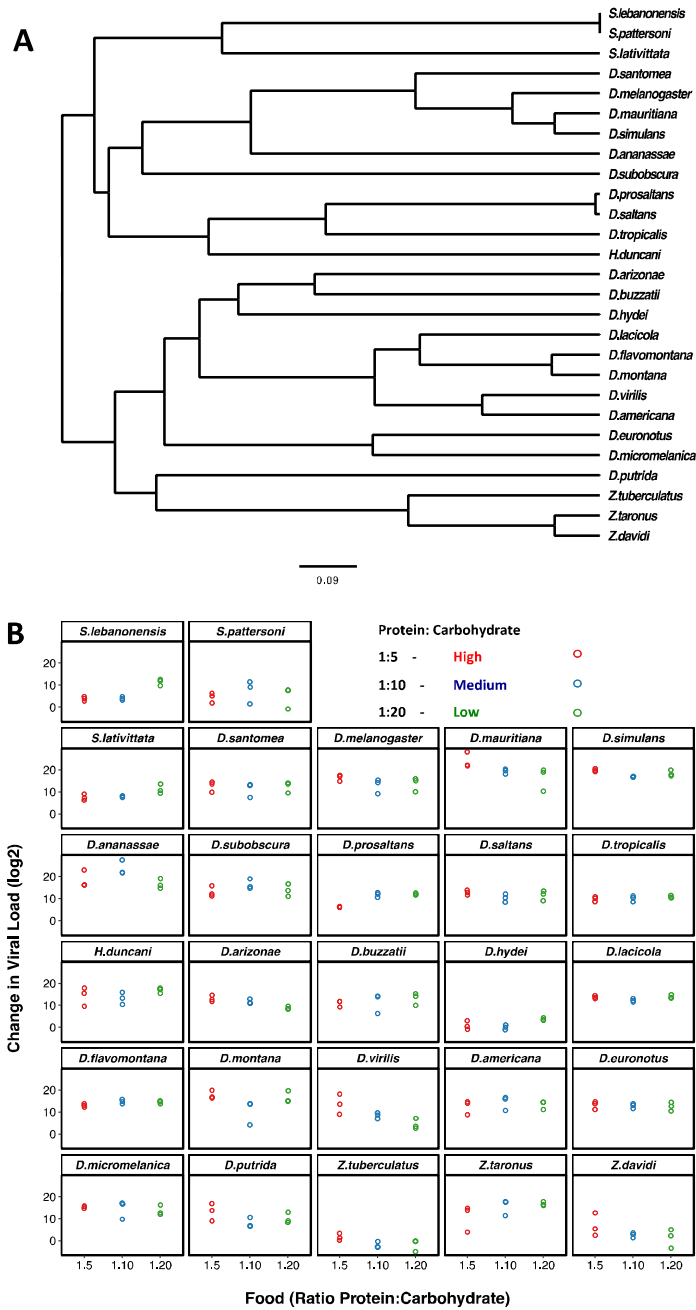

383 We also partitioned the inter-specific variance into that which can be explained  
384 by a Brownian motion model of evolution on the host phylogeny ( $v_p$ ), and a  
385 species-specific component independent of the phylogeny ( $v_s$ ). The proportion of  
386 the between species variance that can be explained by the phylogeny can then be  
387 calculated, using  $v_p/(v_p + v_s)$  (Freckleton *et al.*, 2002), and can be equated to the  
388 phylogenetic heritability or Pagel's lambda (Pagel, 1999; Housworth *et al.*, 2004).  
389 We found that the host phylogeny explained a modest amount of the inter-  
390 specific variation in viral loads across diets, however these estimates had broad  
391 confidence intervals (Low = 0.20 (95% CI:  $3.5 \times 10^{-6}$ , 0.63); Medium = 0.34 (95%  
392 CI:  $2.0 \times 10^{-6}$ , 0.80); High = 0.51 (95% CI:  $3.2 \times 10^{-6}$ , 0.88), due to the model  
393 struggling to separate out the phylogenetic and non-phylogenetic components.

394

395 In order to examine if the susceptibility of species responded in the same or  
396 different ways to the changes in diet we examined viral load across the different  
397 protein: carbohydrate ratios. We found strong positive inter-specific correlations  
398 between viral loads across diet treatments suggesting the species are responding  
399 in similar ways to the changes in ratios (Table 2). There was a decline in the  
400 between species variance in the high diet compared to low and medium – but  
401 this was not significantly different– ( $v_p$ : Low = 77.13 (95% CI: 35.09, 125.50);  
402 Medium = 82.33 (95% CI: 37.55, 135.26); High = 45.59 (95% CI: 19.61, 76.39) and  
403 mean viral loads were similar across the diets (Low = 11.4 (95% CI: 5.3, 17.7);  
404 Medium = 10.6 (95% CI: 3.6, 16.6); High = 10.6 (95% CI: 3.6, 16.7). Residual  
405 variance did not differ significantly between treatments (Low = 6.45 (95% CI:  
406 4.87, 8.04); Medium = 8.23 (95% CI: 6.45, 10.35); High = 8.32 (95% CI: 6.54,  
407 10.6).

408

|                                             |               | <b>Interspecific<br/>Correlation</b> | <b>95% CIs</b> |
|---------------------------------------------|---------------|--------------------------------------|----------------|
| <b>Viral load</b>                           | Low - Medium  | 0.93                                 | 0.85, 0.98     |
|                                             | Medium - High | 0.83                                 | 0.66, 0.96     |
|                                             | Low - High    | 0.80                                 | 0.63, 0.96     |
| <b>Survival in<br/>virus<br/>challenged</b> | Low - Medium  | 0.93                                 | 0.81, 0.99     |
|                                             | Medium - High | 0.88                                 | 0.71, 0.99     |
|                                             | Low - High    | 0.90                                 | 0.73, 0.99     |

409 **Table 2. Inter-specific correlations between viral load and mortality**  
410 **measures across the different diet treatments.**

411

412 As similar pathogen loads can cause different levels of harm to their hosts (Roy &  
413 Kirchner, 2000; Boots, 2008; Råberg *et al.*, 2009) we examined if virus induced  
414 mortality differed across diets over a 20 day period after viral challenge (Fig. 3).  
415 We found differences in the virulence (mortality) caused by DCV between host  
416 species, with some species seeing no apparent change in mortality over the  
417 experimental period compared to sham infected controls, (e.g. *S. pattersoni* and  
418 *D. saltans*), whilst other species show higher susceptibility with up to 50% of  
419 flies dead by day 10 post infection (e.g. *D. simulans* and *D. melanogaster*). As with  
420 the viral load data we calculated the repeatability of survival in these virus  
421 infected flies which was high in all cases (Repeatability; Low = 0.90 (95% CI:  
422 0.78, 0.98); Medium = 0.87 (95% CI: 0.71,0.97); High = 0.98 (95% CI: 0.85, 1.00).  
423 We also calculated the proportion of between species variance that can be  
424 explained by the phylogeny for the virus infected flies (Phylogenetic effect: Low

425 = 0.16 (95% CI:  $2.58 \times 10^{-6}$ , 0.62); Medium = 0.18 (95% CI:  $5.75 \times 10^{-7}$ , 0.78); High  
426 = 0.32 (95% CI:  $7.75 \times 10^{-8}$ , 0.87), which – like the viral load data – had broad  
427 confidence intervals due to the model struggling to separate the phylogenetic  
428 and non-phylogenetic components.

429

430 We found strong positive inter-specific correlations between the survival of  
431 virus challenged flies across the diets, suggesting the species are responding in  
432 similar ways to the dietary changes (Table 2). Among species variance in  
433 mortality of virus infected flies was consistent across diets (Low = 0.18 (95% CI:  
434 0.07, 0.31); Medium = 0.16 (95% CI: 0.04, 0.30); High = 0.12 (95% CI: 0.04, 0.23)  
435 as was the mean mortality (Low = 0.64 (95% CI: 0.47, 0.82); Medium = 0.58  
436 (95% CI: 0.38, 0.75); High = 0.65 (95% CI: 0.47, 0.82). The residual variance was  
437 also consistent across the diets (Low = 0.02 (95% CI: 0.01, 0.03); Medium = 0.02  
438 (95% CI: 0.01, 0.04); High = 0.02 (95% CI: 0.01, 0.03).

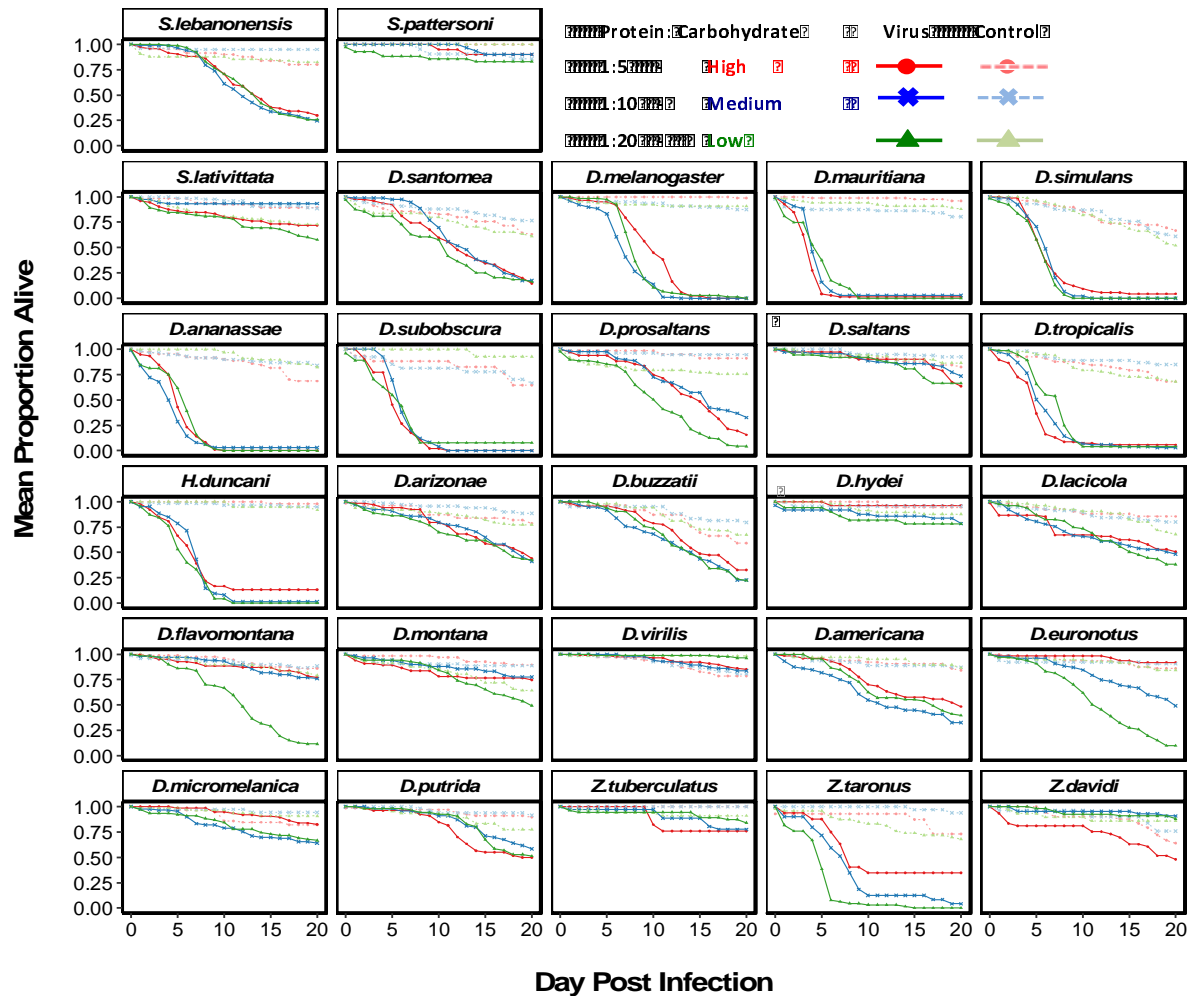

439

440 **Figure 3. Mortality in 27 species of Drosophilidae housed on three different**  
441 **diets of varying protein: carbohydrate ratios. High- red circles, Medium - blue**  
442 **crosses and Low- green triangles and either control stabbed (dashed line) or**  
443 **virally challenged with DCV (solid lines). Panels are labelled in line with the tips**  
444 **in Figure 2A.**

445

446 We found that there were strong positive correlations between mortality and  
447 RNA viral load (interspecific correlations between viral load and survival of virus  
448 infected flies: Low = 0.89 (95% CI: 0.78, 0.98); Medium = 0.85 (95% CI: 0.67,  
449 0.97); High = 0.67 (95% CI: 0.35, 0.90). To confirm that these differences are due  
450 to mortality caused by the virus rather than intrinsic differences in the

451 survivorship of the different species, we also inoculated flies with a control  
452 solution. There was far less mortality in the controls than the virus infected flies  
453 (Fig. 3). There was inter-specific variation in control mortality (Low = 0.18 (95%  
454 CI: 0.01, 0.59); Medium = 0.43 (95% CI: 0.01,0.76); High = 0.55 (95% CI: -0.72,  
455 1.00) but this was not significantly correlated with survival of the virus infected  
456 flies (survival of control versus virus infected on: Low = -0.11 (95% CI: -0.92,  
457 0.75); Medium = 0.34 (95% CI: -0.48 0.97); High = 0.12 (95% CI: -0.82, 0.89). We  
458 found no effect of wing length as a proxy for body size, (mean: -0.05, 95% CI: -  
459 0.13, 0.05).

460

## 461 **Discussion**

462 We found dietary treatments of differing protein to carbohydrate ratios did not  
463 alter the outcome of infection in 27 species of Drosophilidae infected with DCV.  
464 We found strong positive inter-specific correlations across diets in both viral  
465 load and mortality (Table 2), suggesting that the species are in general  
466 responding in similar ways to nutritional changes. Despite there being among  
467 species variation in susceptibility, generally changes in diet did not affect viral  
468 loads, nor did they alter the likelihood of surviving an infection. We found strong  
469 positive correlations between mortality and viral load on each of the diets,  
470 suggesting the amount of harm caused to a host is a result of virus accumulation  
471 within the infected host.

472

473 Although the point estimates of the inter-specific correlations are close to one  
474 (Table 2) – suggesting overall there is limited evidence for interactions between  
475 species and diet, some species do appear to show differences in mortality on

476 different diets (e.g. *D. euronotus* and *D. flavomontana*, Figure 3). These patterns  
477 however, are not present when looking at the viral load data for these species,  
478 and our power analysis suggests we have enough power to detect interaction  
479 effects with our present experimental design. Therefore, further experiments  
480 designed to look specifically at the differences within species are required to  
481 determine if these patterns of mortality would hold true.

482

483 Both mounting and maintaining an immune response requires energy and  
484 nutrients. During an acute immune challenge the provisioning of nutrients may  
485 become more demanding for a host, with pathogen induced malabsorption  
486 through damage to or obstruction of digestive tissues (Lochmiller & Deerenberg,  
487 2000). DCV is known to cause severe pathology of the tissues of the digestive  
488 tract with subsequent accumulation of food in the crop (food storage organ) and  
489 obstruction in the intestine (Chtarbanova *et al.*, 2014). These physical symptoms  
490 alter an infected hosts energy stores with infected flies showing significantly  
491 reduced glycogen and triglyceride levels three to four days post infection  
492 (Chtarbanova *et al.*, 2014). DCV infected flies also increase in body mass, with a  
493 reduced food intake and reduced metabolism, suggesting that they experience  
494 increased water retention (Thomas-Orillard, 1984; Arnold *et al.*, 2013;  
495 Chtarbanova *et al.*, 2014). We therefore hypothesised that changing the ratio of  
496 protein to carbohydrate in the diet may alter outcome of infection, and as species  
497 may all have their own “optimal diet”, that species may respond in different ways  
498 to such changes. However, this does not appear to be the case.

499

500 Geometric frameworks for nutrition were developed in response to the fact that  
501 what is “optimal” will depend on a balance of particular nutrients in the  
502 organism and trait being investigated (Simpson & Raubenheimer, 1995; Archer  
503 *et al.*, 2009; Cotter *et al.*, 2019). For example mice infected with *Salmonella* were  
504 found to survive better on diets containing a higher ratio of protein to  
505 carbohydrate (Peck *et al.*, 1992). As were army worm caterpillars infected with  
506 bacteria, with survival increasing with dietary protein, suggesting high protein  
507 requirements are associated with bacterial resistance (Povey *et al.*, 2009). A  
508 recent study used 10 different protein: carbohydrate diets and challenged flies  
509 with *Pseudomonas entomophila* bacteria (Savola *et al.*, 2020a). Survival on low  
510 protein diets was found to be lower in infected flies and suggested protein was  
511 important for survival during infection. This study also monitored lifespan and  
512 reproduction in flies, and found that regardless of injury and infection, dietary  
513 restriction extended lifespan and reduced reproductive output (Savola *et al.*,  
514 2020a). One potential mechanism of the interaction of diet and infection has  
515 been suggested in research using a model host-pathogen system *in vivo* and *in*  
516 *vitro* (Wilson *et al.*, 2020). Caterpillars of *S. littoralis* challenged with the bacteria  
517 *X. nematophila* *in vivo* and on high dietary protein had slower bacterial growth  
518 with higher survival. When this was combined with *in vitro* experiments the  
519 results suggested this was driven by the osmolality of the hosts’ blood  
520 (hemolymph) being altered by an increase in solutes in the high protein diets  
521 slowing the bacterial growth (Wilson *et al.*, 2020).  
522  
523 Further research on the mechanistic basis of dietary effects on resistance is  
524 needed for other pathogen taxa, including viruses. Immunity to DCV inoculation



525 in *D. melanogaster* has been reported to involve the JAK/STAT and Imd  
526 pathways, and potentially phagocytosis (Van Rij *et al.*, 2006; Zhu *et al.*, 2013;  
527 Lamiable *et al.*, 2016). Additionally, the RNAi pathway is a key antiviral defence  
528 mechanism in *Drosophila* and DCV appears to have evolved to suppress this  
529 response (Van Rij *et al.*, 2006). Although we find no interaction between dietary  
530 protein:carbohydrate and susceptibility, the multifaceted immune response to  
531 DCV may be energetically costly and other nutrients may interact with the ability  
532 of a host to allocate resources between an immune response, damage repair and  
533 the maintenance of homeostasis (Lochmiller & Deerenberg, 2000; Zuk & Stoehr,  
534 2002; Schmid-Hempel, 2005; Sadd & Siva-Jothy, 2006). For example, lipid and  
535 fats have been associated with *D. melanogaster* response to DCV viral infection;  
536 peroxisomes were found to be required for host defense to infection, through  
537 their primary function in lipid metabolism (Aubert *et al.*, 1995). The lipid level  
538 across our diets was held constant, but this may be a potential area for further  
539 study. There has been an increased use of a chemically defined (holidic) diet in  
540 order to manipulate individual nutrients present in fly diets (Lee *et al.*, 2006).  
541 Exome matched diets have been shown to alleviate trade-offs in fecundity and  
542 longevity (Piper *et al.*, 2017). A possible extension of this would be to look at the  
543 effect of matching diets to transcriptional changes during infection, and seeing if  
544 this alleviates (or exacerbates) pathology.

545

546 Changes in diet have been shown to alter pathogen susceptibility in a number of  
547 systems. We hypothesised that changes in diet could alter the potential outcomes  
548 of virus host shifts. However, we found that overall changes in the ratio of  
549 protein to carbohydrate did not alter susceptibility to DCV across host species in

550 this instance. This suggests dietary protein to carbohydrate ratios are not  
551 universally important in determining susceptibility to pathogens. It is unclear if  
552 the lack of studies showing no effect of diet reflect publication biases or whether  
553 our model system is unusual. However, it highlights the need to examine the  
554 importance of diet in explaining susceptibility to pathogens across a broad range  
555 of host and pathogen taxa.

556

557 **References**

- 558 Anderson, R.M., Latorre-Esteves, M., Neves, A.R., Lavu, S., Medvedik, O., Taylor, C.,  
559 *et al.* 2003. Yeast Life-Span Extension by Calorie Restriction Is Independent  
560 of NAD Fluctuation. *Science (80-. )*. **302**: 2124–2126.
- 561 Archer, C.R., Royle, N., South, S., Selman, C. & Hunt, J. 2009. Nutritional geometry  
562 provides food for thought. *Journals Gerontol. - Ser. A Biol. Sci. Med. Sci.* **64**:  
563 956–959.
- 564 Arnold, P.A., Johnson, K.N. & White, C.R. 2013. Physiological and metabolic  
565 consequences of viral infection in *Drosophila melanogaster*. *J. Exp. Biol.* **216**:  
566 3350–3357.
- 567 Aubert, A., Goodall, G. & Dantzer, R. 1995. Compared effects of cold ambient  
568 temperature and cytokines on macronutrient intake in rats. *Physiol. Behav.*  
569 **57**: 869–873. Elsevier.
- 570 Ayres, J.S. & Schneider, D.S. 2009. The Role of Anorexia in Resistance and  
571 Tolerance to Infections in *Drosophila*. *PLoS Biol.* **7**: e1000150.
- 572 Bedhomme, S., Agnew, P., Sidobre, C. & Michalakis, Y. 2004. Virulence reaction  
573 norms across a food gradient. *Proc. R. Soc. B Biol. Sci.* **271**: 739–44.
- 574 Blanford, S. & Thomas, M.B. 1999. Host thermal biology: the key to  
575 understanding host-pathogen interactions and microbial pest control? *Agric.*  
576 *For. Entomol.* **1**: 195–202.
- 577 Blum, J.E., Fischer, C.N., Miles, J. & Handelsman, J. 2013. Frequent replenishment  
578 sustains the beneficial microbiome of *Drosophila melanogaster*. *MBio* **4**: 1–8.
- 579 Boots, M. 2008. Fight or learn to live with the consequences? *Trends Ecol. Evol.*  
580 **23**: 248–250.
- 581 Broderick, N.A. & Lemaitre, B. 2012. Gut-associated microbes of *Drosophila*  
582 *melanogaster*. *Gut Microbes* **3**: 307–321.
- 583 Brooks, D.R. & Hoberg, E.P. 2007. How will global climate change affect parasite-  
584 host assemblages? *Trends Parasitol.* **23**: 571–574.
- 585 Bunning, H., Bassett, L., Clowser, C., Rapkin, J., Jensen, K., House, C.M., *et al.* 2016.  
586 Dietary choice for a balanced nutrient intake increases the mean and  
587 reduces the variance in the reproductive performance of male and female  
588 cockroaches. *Ecol. Evol.* **6**: 4711–4730.
- 589 Camus, M.F.F., Fowler, K., Piper, M.W.D. & Reuter, M. 2017. Sex and genotype  
590 effects on nutrient-dependent fitness landscapes in *Drosophila*  
591 *melanogaster*. *Proc. R. Soc. B Biol. Sci.* **284**: 20172237.
- 592 Carlson, C.J., Albery, G.F., Merow, C., Trisos, C.H., Zipfel, C.M., Eskew, E.A., *et al.*  
593 2020. Climate change will drive novel cross-species viral transmission.  
594 *bioRxiv* 2020.01.24.918755.
- 595 Cherry, S. & Perrimon, N. 2004. Entry is a rate-limiting step for viral infection in a  
596 *Drosophila melanogaster* model of pathogenesis. *Nat. Immunol.* **5**: 81–87.
- 597 Christian, P.D. 1987. Studies on *Drosophila C* and *A* viruses in Australian  
598 populations of *Drosophila melanogaster*. Australian National University.
- 599 Chtarbanova, S., Lamiable, O., Lee, K.-Z., Galiana, D., Troxler, L., Meignin, C., *et al.*  
600 2014. *Drosophila C* virus systemic infection leads to intestinal obstruction. *J.*  
601 *Virol.* **88**: 14057–69.
- 602 Cotter, S.C., Reavey, C.E., Tummala, Y., Randall, J.L., Holdbrook, R., Ponton, F., *et al.*  
603 2019. Diet modulates the relationship between immune gene expression  
604 and functional immune responses. *Insect Biochem. Mol. Biol.* **109**: 128–141.
- 605 Cotter, S.C., Simpson, S.J., Raubenheimer, D. & Wilson, K. 2011. Macronutrient

- 606 balance mediates trade-offs between immune function and life history  
607 traits. *Funct. Ecol.* **25**: 186–198.
- 608 Cumnock, K., Gupta, A.S., Lissner, M., Chevee, V., Davis, N.M. & Schneider, D.S.  
609 2018. Host Energy Source Is Important for Disease Tolerance to Malaria.  
610 *Curr. Biol.* **28**: 1635-1642.e3.
- 611 Drummond, A., Suchard, M., Xi, E.D. & Rambaut, A. 2012. Bayesian phylogenetics  
612 with BEAUti and the BEAST 1.7. *Molecular Biology And Evolution* **29**.
- 613 Fanson, B.G., Weldon, C.W., Pérez-Staples, D., Simpson, S.J. & Taylor, P.W. 2009.  
614 Nutrients, not caloric restriction, extend lifespan in Queensland fruit flies  
615 (*Bactrocera tryoni*). *Aging Cell* **8**: 514–523. John Wiley & Sons, Ltd.
- 616 Fellous, S. & Lazzaro, B.P. 2010. Larval food quality affects adult (but not larval)  
617 immune gene expression independent of effects on general condition. *Mol.*  
618 *Ecol.* **19**: 1462–1468.
- 619 Felsenstein, J. 1973. Maximum-likelihood estimation of evolutionary trees from  
620 continuous characters. *Am. J. Hum. Genet.* **25**: 471–492.
- 621 Ferreira, Á.G., Naylor, H., Esteves, S.S., Pais, I.S., Martins, N.E. & Teixeira, L. 2014.  
622 The Toll-Dorsal Pathway Is Required for Resistance to Viral Oral Infection in  
623 *Drosophila*. *PLoS Pathog.* **10**.
- 624 Freckleton, R.P., Harvey, P.H. & Pagel, M. 2002. Phylogenetic analysis and  
625 comparative data: a test and review of evidence. *Am. Nat.* **160**: 712–26.
- 626 Grueber, C.E., Gray, L.J., Morris, K.M., Simpson, S.J. & Senior, A.M. 2018.  
627 Intergenerational effects of nutrition on immunity: a systematic review and  
628 meta-analysis. *Biol. Rev. Camb. Philos. Soc.* **93**: 1108–1124.
- 629 Hadfield, J.D. 2010. MCMC methods for multi-response generalized linear mixed  
630 models: The MCMCglmm R package. *J. Stat. Softw.* **33**: 1–22.
- 631 Hall, S.R., Knight, C.J., Becker, C.R., Duffy, M.A., Tessier, A.J. & Cáceres, C.E. 2009.  
632 Quality matters: Resource quality for hosts and the timing of epidemics.  
633 *Ecol. Lett.* **12**: 118–128.
- 634 Harvell, C.D., Mitchell, C.E., Ward, J.R., Altizer, S., Dobson, A.P., Ostfeld, R.S., *et al.*  
635 2002. Climate warming and disease risks for terrestrial and marine biota.  
636 *Science* **296**: 2158–62.
- 637 Hayman, D.T.S., Pulliam, J.R.C., Marshall, J.C., Cryan, P.M. & Webb, C.T. 2016.  
638 Environment, host, and fungal traits predict continental-scale white-nose  
639 syndrome in bats. *Sci. Adv.* **2**: e1500831.
- 640 Henry, Y. & Colinet, H. 2018. Microbiota disruption leads to reduced cold  
641 tolerance in *Drosophila* flies. *Sci. Nat.* **105**: 59. The Science of Nature.
- 642 Henry, Y., Overgaard, J. & Colinet, H. 2020. Dietary nutrient balance shapes  
643 phenotypic traits of *Drosophila melanogaster* in interaction with gut  
644 microbiota. *Comp. Biochem. Physiol. Part A Mol. Integr. Physiol.* **241**: 110626.
- 645 Hoberg, E.P. & Brooks, D.R. 2015. Evolution in action: climate change,  
646 biodiversity dynamics and emerging infectious disease. *Philos. Trans. R. Soc.*  
647 *Lond. B. Biol. Sci.* **370**: 20130553–20130553. The Royal Society.
- 648 Housworth, E.A., Martins, E.P. & Lynch, M. 2004. The phylogenetic mixed model.  
649 *Am. Nat.* **163**: 84–96.
- 650 Howick, V.M. & Lazzaro, B.P. 2014. Genotype and diet shape resistance and  
651 tolerance across distinct phases of bacterial infection. *BMC Evol. Biol.* **14**.
- 652 Huey, R.B., Moreteau, B., Moreteau, J.-C., Gibert, P., Gilchrist, G.W., Ives, A.R., *et al.*  
653 2006. Sexual size dimorphism in a *Drosophila* clade, the *D. obscura* group.  
654 *Zoology* **109**: 318–330.

- 655 Jensen, K., McClure, C., Priest, N.K. & Hunt, J. 2015. Sex-specific effects of protein  
656 and carbohydrate intake on reproduction but not lifespan in *Drosophila*  
657 *melanogaster*. *Aging Cell* **14**: 605–615.
- 658 Jousset, F.X., Plus, N., Croizier, G. & Thomas, M. 1972. [Existence in *Drosophila* of  
659 2 groups of picornavirus with different biological and serological  
660 properties]. *C. R. Acad. Sci. Hebd. Seances Acad. Sci. D.* **275**: 3043–6.
- 661 Kearse, M., Moir, R., Wilson, A., Stones-Havas, S., Cheung, M., Sturrock, S., *et al.*  
662 2012. Geneious Basic: an integrated and extendable desktop software  
663 platform for the organization and analysis of sequence data. *Bioinformatics*  
664 **28**: 1647–1649.
- 665 Keaton Wilson, J., Ruiz, L. & Davidowitz, G. 2019. Dietary Protein and  
666 Carbohydrates Affect Immune Function and Performance in a Specialist  
667 Herbivore Insect ( *Manduca sexta* ). *Physiol. Biochem. Zool.* **92**: 58–70.
- 668 Kirk, D., Jones, N., Peacock, S., Phillips, J., Molnár, P.K., Krkošek, M., *et al.* 2018.  
669 Empirical evidence that metabolic theory describes the temperature  
670 dependency of within-host parasite dynamics. *PLOS Biol.* **16**: e2004608.
- 671 Klass, M.R. 1983. A method for the isolation of longevity mutants in the  
672 nematode *Caenorhabditis elegans* and initial results. *Mech. Ageing Dev.* **22**:  
673 279–286.
- 674 Knutie, S.A., Wilkinson, C.L., Wu, Q.C., Ortega, C.N. & Rohr, J.R. 2017. Host  
675 resistance and tolerance of parasitic gut worms depend on resource  
676 availability. *Oecologia* **183**: 1031–1040.
- 677 Kraaijeveld, A.R. & Godfray, H.C. 1997. Trade-off between parasitoid resistance  
678 and larval competitive ability in *Drosophila melanogaster*. *Nature* **389**: 278–  
679 80.
- 680 Kutzer, M.A.M. & Armitage, S.A.O. 2016. The effect of diet and time after bacterial  
681 infection on fecundity, resistance, and tolerance in *Drosophila melanogaster*.  
682 *Ecol. Evol.* **6**: 4229–4242.
- 683 Lamiable, O., Arnold, J., de Faria, I.J. da S., Olmo, R.P., Bergami, F., Meignin, C., *et al.*  
684 2016. Analysis of the Contribution of Hemocytes and Autophagy to  
685 *Drosophila* Antiviral Immunity. *J. Virol.* **90**: 5415–5426.
- 686 Lazzaro, B.P. & Little, T.J. 2009. Immunity in a variable world. *Philos. Trans. R.*  
687 *Soc. Lond. B. Biol. Sci.* **364**: 15–26.
- 688 Le Couteur, D.G., Solon-Biet, S., Cogger, V.C., Mitchell, S.J., Senior, A., De Cabo, R., *et*  
689 *al.* 2016. The impact of low-protein high-carbohydrate diets on aging and  
690 lifespan. *Cell. Mol. Life Sci.* **73**: 1237–1252.
- 691 Lee, K., Cory, J., Wilson, K., Raubenheimer, D. & Simpson, S. 2006. Flexible diet  
692 choice offsets protein costs of pathogen resistance in a caterpillar. *Proc. R.*  
693 *Soc. B Biol. Sci.* **273**: 823–829.
- 694 Lee, K.P., Simpson, S.J. & Wilson, K. 2008. Dietary protein-quality influences  
695 melanization and immune function in an insect. *Funct. Ecol.* **22**: 1052–1061.
- 696 Lesperance, D.N.A. & Broderick, N.A. 2020. Meta-analysis of Diets Used in  
697 *Drosophila* Microbiome Research and Introduction of the *Drosophila*  
698 Dietary Composition Calculator (DDCC). *G3 Genes, Genomes, Genet.*  
699 g3.401235.2020.
- 700 Lochmiller, R.L. & Deerenberg, C. 2000. Trade-offs in evolutionary immunology:  
701 Just what is the cost of immunity? *Oikos* **88**: 87–98.
- 702 Longdon, B., Cao, C., Martinez, J. & Jiggins, F.M. 2013. Previous Exposure to an  
703 RNA Virus Does Not Protect against Subsequent Infection in *Drosophila*

- 704 melanogaster. *PLoS One* **8**: e73833.
- 705 Longdon, B., Day, J.P., Alves, J.M., Smith, S.C.L., Houslay, T.M., McGonigle, J.E., *et al.*
- 706 2018. Host shifts result in parallel genetic changes when viruses evolve in
- 707 closely related species. *PLoS Pathog.* **14**: e1006951.
- 708 Longdon, B., Hadfield, J.D., Day, J.P., Smith, S.C.L., McGonigle, J.E., Cogni, R., *et al.*
- 709 2015. The Causes and Consequences of Changes in Virulence following
- 710 Pathogen Host Shifts. *PLOS Pathog.* **11**: e1004728.
- 711 Longdon, B., Hadfield, J.D., Webster, C.L., Obbard, D.J. & Jiggins, F.M. 2011. Host
- 712 phylogeny determines viral persistence and replication in novel hosts. *PLoS*
- 713 *Pathog.* **7**: e1002260.
- 714 Maklakov, A.A., Hall, M.D., Simpson, S.J., Dessmann, J., Clissold, F.J., Zajitschek, F.,
- 715 *et al.* 2009. Sex differences in nutrient-dependent reproductive ageing.
- 716 *Aging Cell* **8**: 324–330.
- 717 McKean, K.A., Yourth, C.P., Lazzaro, B.P. & Clark, A.G. 2008. The evolutionary
- 718 Merklung, S.H. & van Rij, R.P. 2015. Analysis of resistance and tolerance to virus
- 719 infection in *Drosophila*. *Nat. Protoc.* **10**: 1084–97.
- 720 Moatt, J.P., Savola, E., Regan, J.C., Nussey, D.H. & Walling, C.A. 2020. Lifespan
- 721 Extension Via Dietary Restriction: Time to Reconsider the Evolutionary
- 722 Mechanisms? *BioEssays* 1900241.
- 723 Nakagawa, S., Lagisz, M., Hector, K.L. & Spencer, H.G. 2012. Comparative and
- 724 meta-analytic insights into life extension via dietary restriction. *Aging Cell*
- 725 **11**: 401–409.
- 726 Pagel, M. 1999. Inferring the historical patterns of biological evolution. *Nature*
- 727 **401**: 877–884.
- 728 Peck, M.D., Babcock, G.F. & Alexander, J.W. 1992. The role of protein and calorie
- 729 restriction in outcome from *Salmonella* infection in mice. *J. Parenter. Enter.*
- 730 *Nutr.* **16**: 561–565.
- 731 Pike, V.L., Lythgoe, K.A. & King, K.C. 2019. On the diverse and opposing effects of
- 732 nutrition on pathogen virulence. *Proc. R. Soc. B Biol. Sci.* **286**: 20191220.
- 733 Piper, M.D. 2017. Using artificial diets to understand the nutritional physiology of
- 734 *Drosophila melanogaster*. *Curr. Opin. Insect Sci.* **23**: 104–111.
- 735 Piper, M.D.W., Soultoukis, G.A., Blanc, E., Mesaros, A., Herbert, S.L., Juricic, P., *et al.*
- 736 2017. Matching Dietary Amino Acid Balance to the In Silico-Translated
- 737 Exome Optimizes Growth and Reproduction without Cost to Lifespan. *Cell*
- 738 *Metab.* **25**: 610–621.
- 739 Ponton, F., Wilson, K., Cotter, S.C., Raubenheimer, D. & Simpson, S.J. 2011.
- 740 Nutritional immunology: A multi-dimensional approach. *PLoS Pathog.* **7**:
- 741 e1002223.
- 742 Ponton, F., Wilson, K., Holmes, A.J., Cotter, S.C., Raubenheimer, D. & Simpson, S.J.
- 743 2013. Integrating nutrition and immunology: a new frontier. *J. Insect Physiol.*
- 744 **59**: 130–7.
- 745 Povey, S., Cotter, S.C., Simpson, S.J., Lee, K.P. & Wilson, K. 2009. Can the protein
- 746 costs of bacterial resistance be offset by altered feeding behaviour? *J. Anim.*
- 747 *Ecol.* **78**: 437–446.
- 748 Povey, S., Cotter, S.C., Simpson, S.J. & Wilson, K. 2014. Dynamics of macronutrient
- 749 self-medication and illness-induced anorexia in virally infected insects. *J.*
- 750 *Anim. Ecol.* **83**: 245–255.
- 751 R Development Core Team. 2005. *R: A Language and Environment for Statistical*
- 752 *Computing*. R Foundation for Statistical Computing, Vienna, Austria.

- 753 Råberg, L., Graham, A.L. & Read, A.F. 2009. Decomposing health: tolerance and  
754 resistance to parasites in animals. *Philos. Trans. R. Soc. B Biol. Sci.* **364**: 37–  
755 49.
- 756 Rambaut, A. 2006. FigTree v1.4.4. Available:  
757 <http://tree.bio.ed.ac.uk/software/figtree/>.
- 758 Rambaut, A., Suchard, M., Xie, D. & Drummond, A. 2014. Tracer v1.6.  
759 <https://github.com/beast-dev/tracer/releases/tag/v1.7.1>
- 760 Rao, S., Schieber, A.M.P., O'Connor, C.P., Leblanc, M., Michel, D. & Ayres, J.S. 2017.  
761 Pathogen-Mediated Inhibition of Anorexia Promotes Host Survival and  
762 Transmission. *Cell* **168**: 503-516.e12.
- 763 Raubenheimer, D. & Simpson, S.J. 1999. Integrating nutrition: A geometrical  
764 approach. In: *Entomologia Experimentalis et Applicata*, pp. 67–82. Wiley.
- 765 Roberts, K.E., Hadfield, J.D., Sharma, M.D. & Longdon, B. 2018. Changes in  
766 temperature alter the potential outcomes of virus host shifts. *PLOS Pathog.*  
767 **14**: e1007185.
- 768 Roy, B.A. & Kirchner, J.W. 2000. Evolutionary Dynamics of Pathogen Resistance  
769 and Tolerance. *Evolution (N. Y.)* **54**: 51–63.
- 770 Sadd, B.M. & Siva-Jothy, M.T. 2006. Self-harm caused by an insect's innate  
771 immunity. *Proc. Biol. Sci.* **273**: 2571–4.
- 772 Savola, E., Montgomery, C., Waldron, F.M., Monteith, K., Vale, P. & Walling, C.A.  
773 2020a. Testing evolutionary explanations for the lifespan benefit of dietary  
774 restriction in *Drosophila melanogaster*. *bioRxiv*, doi:  
775 <https://doi.org/10.1101/2020.06.18.159731>.
- 776 Savola, E., Vale, P. & Walling, C.A. 2020b. Larval diet affects adult reproduction  
777 but not survival regardless of injury and infection stress in *Drosophila*  
778 *melanogaster*. *bioRxiv* 1–29. <https://doi.org/10.1101/2020.10.16.342618>
- 779 Schmid-Hempel, P. 2005. Evolutionary ecology of insect immune defenses. *Annu.*  
780 *Rev. Entomol.* **50**: 529–51.
- 781 Sheldon, B.C. & Verhulst, S. 1996. Ecological immunology: costly parasite  
782 defences and trade offs in evolutionary ecology. *Trends Ecol. Evol.* **11**: 317–  
783 321.
- 784 Simpson, S.J. & Raubenheimer, D. 1995. The geometric analysis of feeding and  
785 nutrition: a user's guide. Pergamon.
- 786 Simpson, S.J. & Raubenheimer, D. 2011. The nature of nutrition: A unifying  
787 framework. *Aust. J. Zool.* **59**: 350–368.
- 788 Siva-Jothy, M.T. & Thompson, J.J.W. 2002. Short-term nutrient deprivation affects  
789 immune function. *Physiol. Entomol.* **27**: 206–212.
- 790 Skorupa, D.A., Dervisevic, A., Zwiener, J. & Pletcher, S.D. 2008. Dietary  
791 composition specifies consumption, obesity, and lifespan in *Drosophila*  
792 *melanogaster*. *Aging Cell* **7**: 478–490.
- 793 Sullivan, W., Ashburner, M. & Hawley, R.S. 2000. *Drosophila* protocols. *Drosoph.*  
794 *Protoc.* Cold Spring Harbor Laboratory Press.
- 795 Thomas-Orillard, M. 1984. Modifications of Mean Ovariole Number, Fresh Weight  
796 of Adult Females and Developmental Time in *DROSOPHILA*  
797 *MELANOGASTER* Induced by *Drosophila C Virus*. *Genetics* **107**: 635–63544.
- 798 Vale, P.F. & Jardine, M.D. 2017. Infection avoidance behavior: Viral exposure  
799 reduces the motivation to forage in female *Drosophila melanogaster*. *Fly*  
800 *(Austin)*. **11**: 3–9.
- 801 Van Rij, R.P., Saleh, M.C., Berry, B., Foo, C., Houk, A., Antoniewski, C., *et al.* 2006.

- 802       The RNA silencing endonuclease Argonaute 2 mediates specific antiviral  
803       immunity in *Drosophila melanogaster*. *Genes Dev.* **20**: 2985–2995
- 804       Weindruch, R. & Walford, R.L. 1982. Dietary restriction in mice beginning at 1  
805       year of age: Effect on life-span and spontaneous cancer incidence. *Science*  
806       (80-). **215**: 1415–1418.
- 807       Wilson, K., Holdbrook, R., Reavey, C.E., Randall, J.L., Tummala, Y., Ponton, F., *et al.*  
808       2020. Osmolality as a Novel Mechanism Explaining Diet Effects on the  
809       Outcome of Infection with a Blood Parasite. *Curr. Biol.* **30**: 2459–2467.
- 810       Woolhouse, M.E.J., Haydon, D.T. & Antia, R. 2005. Emerging pathogens: the  
811       epidemiology and evolution of species jumps. *Trends Ecol. Evol.* **20**: 238–  
812       244.
- 813       Zhu, F., Ding, H. & Zhu, B. 2013. Transcriptional profiling of *Drosophila* S2 cells in  
814       early response to *Drosophila* C virus. *Viol. J.* **10**: 210.
- 815       Zuk, M. & Stoehr, A.M. 2002. Immune Defense and Host Life History. *Am. Nat.*  
816       **160**: S9–S22.
- 817
